# Supplementary material for: Influence of ABO Locus on PFA-100 Collagen-ADP Closure Time Is Not Totally Dependent on the Von Willebrand Factor. Results of a GWAS on GAIT-2 Project Phenotypes
Source: PubMed Central journal article supplement (PMC6651679; doi:10.3390/ijms20133221), 2019-06-30
Supplement: ijms-20-03221-s001.pdf [file ijms-20-03221-s001.pdf]

**Supplementary Table S1.** Description of the 70 significant SNPs associated with PFA-100 phenotypes: position in the *ABO* gene (chromosome 9), location, and significance levels. For collagen-ADP only, the same parameters after adjusting for von Willebrand factor and for coagulation factor VIII.

| SNP name    | Position (bp) | Location              | MAF   | Association with Col-Epi p-value | Association with Col-ADP p-value |                     |                     |
|-------------|---------------|-----------------------|-------|----------------------------------|----------------------------------|---------------------|---------------------|
|             |               |                       |       | Non-adjusted                     | Non-adjusted                     | Adjusted for VWF    | Adjusted for FVIII  |
| rs8176719   | 136132909     | coding, 5-UTR, intron | 0.459 | 1.88 <sup>-9</sup>               | 5.21 <sup>-14</sup>              |                     |                     |
| rs687621    | 136137066     | intron                | 0.432 | 3.50 <sup>-9</sup>               | 1.50 <sup>-15</sup>              | 1.85 <sup>-10</sup> | 6.58 <sup>-11</sup> |
| rs687289    | 136137107     | intron                | 0.433 | 5.72 <sup>-9</sup>               | 1.93 <sup>-15</sup>              | 1.96 <sup>-10</sup> | 7.12 <sup>-11</sup> |
| rs8176685   | 136138766     | intron                | 0.310 | 5.80 <sup>-9</sup>               | 1.10 <sup>-12</sup>              | 1.72 <sup>-8</sup>  | 6.51 <sup>-9</sup>  |
| rs657152    | 136139266     | intron                | 0.460 | 1.52 <sup>-9</sup>               | 6.09 <sup>-15</sup>              | 4.10 <sup>-10</sup> | 1.89 <sup>-10</sup> |
| rs149092047 | 136139908     | intron                | 0.349 |                                  | 3.32 <sup>-10</sup>              |                     |                     |
| rs2519093   | 136141871     | intron                | 0.312 | 6.01 <sup>-9</sup>               | 1.16 <sup>-12</sup>              | 1.66 <sup>-8</sup>  | 6.27 <sup>-9</sup>  |
| rs514659    | 136142204     | intron                | 0.433 | 1.04 <sup>-8</sup>               | 6.04 <sup>-15</sup>              |                     | 2.02 <sup>-10</sup> |
| rs644234    | 136142218     | intron                | 0.460 | 2.18 <sup>-9</sup>               | 1.43 <sup>-14</sup>              | 4.86 <sup>-10</sup> | 3.47 <sup>-10</sup> |
| rs643434    | 136142356     | intron                | 0.460 | 2.18 <sup>-9</sup>               | 1.43 <sup>-14</sup>              | 7.40 <sup>-10</sup> | 3.47 <sup>-10</sup> |
| rs543040    | 136143001     | intron                | 0.433 | 1.04 <sup>-8</sup>               | 6.10 <sup>-15</sup>              | 7.40 <sup>-10</sup> | 2.01 <sup>-10</sup> |
| rs613534    | 136143121     | intron                | 0.460 | 2.18 <sup>-9</sup>               | 1.43 <sup>-14</sup>              | 4.88 <sup>-10</sup> | 3.47 <sup>-10</sup> |
| rs543968    | 136143122     | intron                | 0.460 | 2.18 <sup>-9</sup>               | 1.43 <sup>-14</sup>              | 7.40 <sup>-10</sup> | 3.47 <sup>-10</sup> |
| rs544873    | 136143213     | intron                | 0.460 | 2.18 <sup>-9</sup>               | 1.43 <sup>-14</sup>              | 7.40 <sup>-10</sup> | 3.48 <sup>-10</sup> |
| rs545971    | 136143373     | intron                | 0.433 | 1.04 <sup>-8</sup>               | 6.03 <sup>-15</sup>              | 7.40 <sup>-10</sup> | 2.02 <sup>-10</sup> |
| rs612169    | 136143443     | intron                | 0.433 | 1.04 <sup>-8</sup>               | 6.05 <sup>-15</sup>              | 4.85 <sup>-10</sup> | 2.02 <sup>-10</sup> |
| rs597988    | 136144285     | intron                | 0.407 | 1.40 <sup>-8</sup>               | 1.67 <sup>-15</sup>              | 4.87 <sup>-10</sup> | 5.00 <sup>-11</sup> |
| rs597974    | 136144298     | intron                | 0.406 | 1.45 <sup>-8</sup>               | 4.08 <sup>-15</sup>              | 1.55 <sup>-10</sup> | 1.02 <sup>-10</sup> |
| rs140114497 | 136144309     | intron                | 0.394 |                                  | 8.12 <sup>-14</sup>              | 3.26 <sup>-10</sup> | 1.37 <sup>-9</sup>  |
| rs576125    | 136144310     | intron                | 0.394 |                                  | 8.12 <sup>-14</sup>              | 4.87 <sup>-9</sup>  | 1.37 <sup>-9</sup>  |
| rs8176663   | 136144428     | intron                | 0.433 | 1.04 <sup>-8</sup>               | 6.05 <sup>-15</sup>              | 4.87 <sup>-9</sup>  | 2.02 <sup>-10</sup> |
| rs491626    | 136144874     | intron                | 0.433 | 1.04 <sup>-8</sup>               | 6.05 <sup>-15</sup>              | 4.87 <sup>-10</sup> | 2.02 <sup>-10</sup> |

|             |           |        |       |             |              |              |              |
|-------------|-----------|--------|-------|-------------|--------------|--------------|--------------|
| rs492488    | 136144961 | intron | 0.433 | $1.04^{-8}$ | $6.05^{-15}$ | $4.87^{-10}$ | $2.02^{-10}$ |
| rs493246    | 136144995 | intron | 0.433 | $1.04^{-8}$ | $6.06^{-15}$ | $4.87^{-10}$ | $2.02^{-10}$ |
| rs494242    | 136145119 | intron | 0.460 | $2.17^{-9}$ | $1.43^{-14}$ | $4.87^{-10}$ | $3.48^{-10}$ |
| rs495203    | 136145241 | intron | 0.433 | $1.04^{-8}$ | $6.06^{-15}$ | $7.42^{-10}$ | $2.02^{-10}$ |
| rs200700167 | 136145404 | intron | 0.368 |             | $1.74^{-9}$  | $4.88^{-10}$ |              |
| rs200533593 | 136145419 | intron | 0.341 | $3.66^{-8}$ | $1.93^{-11}$ |              |              |
| rs201298979 | 136145425 | intron | 0.305 |             | $5.28^{-9}$  |              |              |
| rs9411378   | 136145426 | intron | 0.317 |             | $4.42^{-8}$  |              |              |
| rs582118    | 136145472 | intron | 0.433 | $1.04^{-8}$ | $6.06^{-15}$ | $4.88^{-10}$ | $2.02^{-10}$ |
| rs582094    | 136145485 | intron | 0.433 | $1.04^{-8}$ | $6.06^{-15}$ | $4.88^{-10}$ | $2.02^{-10}$ |
| rs34357864  | 136145908 | intron | 0.429 | $1.19^{-8}$ | $4.10^{-15}$ | $4.17^{-10}$ | $1.68^{-10}$ |
| rs2769071   | 136145975 | intron | 0.429 | $1.18^{-8}$ | $4.28^{-15}$ | $4.32^{-10}$ | $1.74^{-10}$ |
| rs677355    | 136146047 | intron | 0.423 |             | $1.03^{-14}$ | $6.49^{-10}$ | $3.08^{-10}$ |
| rs200738971 | 136146062 | intron | 0.423 |             | $1.03^{-14}$ | $6.49^{-10}$ | $3.08^{-10}$ |
| rs59602812  | 136146069 | intron | 0.423 |             | $1.03^{-14}$ | $6.49^{-10}$ | $3.08^{-10}$ |
| rs676996    | 136146078 | intron | 0.423 |             | $1.03^{-14}$ | $6.49^{-10}$ | $3.08^{-10}$ |
| rs676457    | 136146228 | intron | 0.433 | $1.05^{-8}$ | $6.12^{-15}$ | $4.93^{-10}$ | $2.04^{-10}$ |
| rs527210    | 136146432 | intron | 0.433 | $1.05^{-8}$ | $6.12^{-15}$ | $4.93^{-10}$ | $2.04^{-10}$ |
| rs139840563 | 136146449 | intron | 0.412 |             | $6.17^{-14}$ | $1.09^{-9}$  | $9.55^{-10}$ |
| rs550057    | 136146598 | intron | 0.351 |             | $5.93^{-10}$ |              |              |
| rs674302    | 136146665 | intron | 0.433 | $1.04^{-8}$ | $6.06^{-15}$ | $4.88^{-10}$ | $2.02^{-10}$ |
| rs554833    | 136147161 | intron | 0.433 | $1.03^{-8}$ | $6.14^{-15}$ | $4.97^{-10}$ | $2.04^{-10}$ |
| rs660340    | 136147554 | intron | 0.389 |             | $8.47^{-9}$  |              |              |
| rs581107    | 136147703 | intron | 0.389 |             | $8.61^{-9}$  |              |              |
| rs659104    | 136147824 | intron | 0.389 |             | $8.49^{-9}$  |              |              |
| rs647800    | 136148001 | intron | 0.362 |             | $7.40^{-9}$  |              |              |
| rs473533    | 136148036 | intron | 0.389 |             | $8.50^{-9}$  |              |              |
| rs475419    | 136148232 | intron | 0.389 |             | $8.52^{-9}$  |              |              |

|             |           |                      |       |                    |                     |                     |                     |
|-------------|-----------|----------------------|-------|--------------------|---------------------|---------------------|---------------------|
| rs476410    | 136148369 | intron               | 0.389 |                    | 8.53 <sup>-9</sup>  |                     |                     |
| rs645982    | 136148410 | intron               | 0.389 |                    | 8.54 <sup>-9</sup>  |                     |                     |
| rs8176646   | 136149096 | intron               | 0.460 | 2.35 <sup>-9</sup> | 2.25 <sup>-14</sup> | 1.07 <sup>-9</sup>  | 4.00 <sup>-10</sup> |
| rs116552240 | 136149099 | intron               | 0.460 | 2.38 <sup>-9</sup> | 2.22 <sup>-14</sup> | 1.06 <sup>-9</sup>  | 3.95 <sup>-10</sup> |
| rs505922    | 136149230 | intron               | 0.433 | 1.12 <sup>-8</sup> | 9.68 <sup>-15</sup> | 7.20 <sup>-10</sup> | 2.39 <sup>-10</sup> |
| rs507666    | 136149400 | intron               | 0.313 | 6.36 <sup>-9</sup> | 2.29 <sup>-12</sup> | 3.19 <sup>-8</sup>  | 1.04 <sup>-8</sup>  |
| rs529565    | 136149501 | intron               | 0.434 | 1.00 <sup>-8</sup> | 1.86 <sup>-14</sup> | 1.26 <sup>-9</sup>  | 3.91 <sup>-10</sup> |
| rs630510    | 136149582 | intron               | 0.407 |                    | 8.75 <sup>-10</sup> |                     |                     |
| rs146518861 | 136149710 | intron               | 0.310 | 9.30 <sup>-9</sup> | 9.17 <sup>-13</sup> | 1.57 <sup>-8</sup>  | 5.97 <sup>-9</sup>  |
| rs630014    | 136149723 | intron               | 0.407 |                    | 8.74 <sup>-10</sup> |                     |                     |
| rs532436    | 136149831 | intron               | 0.312 | 5.80 <sup>-9</sup> | 1.50 <sup>-12</sup> | 2.18 <sup>-8</sup>  | 7.61 <sup>-9</sup>  |
| rs616154    | 136150467 | promoter, intron     | 0.413 |                    | 4.71 <sup>-10</sup> |                     |                     |
| rs559723    | 136150485 | promoter, intron     | 0.413 |                    | 4.71 <sup>-10</sup> |                     |                     |
| rs600038    | 136151807 | promoter, intergenic | 0.340 | 1.70 <sup>-9</sup> | 5.70 <sup>-12</sup> | 4.36 <sup>-8</sup>  | 1.57 <sup>-8</sup>  |
| rs651007    | 136153876 | intergenic           | 0.340 | 2.32 <sup>-9</sup> | 8.02 <sup>-12</sup> | 4.84 <sup>-8</sup>  |                     |
| rs579459    | 136154169 | intergenic           | 0.338 | 1.35 <sup>-9</sup> | 3.75 <sup>-12</sup> | 2.58 <sup>-8</sup>  |                     |
| rs649129    | 136154305 | intergenic           | 0.340 | 2.19 <sup>-9</sup> | 6.88 <sup>-12</sup> | 4.22 <sup>-8</sup>  |                     |
| rs495828    | 136154868 | intergenic           | 0.340 | 2.28 <sup>-9</sup> | 7.71 <sup>-12</sup> | 4.69 <sup>-8</sup>  |                     |
| rs635634    | 136155001 | intergenic           | 0.312 | 4.74 <sup>-9</sup> | 9.69 <sup>-13</sup> | 1.33 <sup>-8</sup>  | 4.74 <sup>-9</sup>  |
| rs633862    | 136155445 | intergenic           | 0.391 |                    | 2.41 <sup>-9</sup>  |                     |                     |

The Genome Reference release used was GRCh37/hg19.p13

SNP = single nucleotide polymorphism; MAF = minor allele frequency; Col-Epi = collagen-epinephrine closure time; Col-ADP = collagen-ADP closure time; VWF = von Willebrand factor antigen; FVIII = coagulant factor VIII activity.

Col-Epi was adjusted for VWF, FVIII and *ABO* genotype; in all of these adjustments all the SNPs lost their genome-wide significance ( $p\text{-value} < 5 \times 10^{-8}$ ), so they do not appear in the table. Col-ADP was adjusted for VWF, FVIII and *ABO* genotype; in the VWF and FVIII adjustments, the number of significant SNPs was reduced as well as its significance, and, in the *ABO* genotype adjustment, all the SNPs lost their statistical significance, so they do not appear in the table.
